# Supplementary material for: The Phenolic Compounds Profile and Cosmeceutical Significance of Two Kazakh Species of Onions: Allium galanthum and A. turkestanicum
Source: MDPI journal article supplement (doi:10.3390/molecules26185491), 2021-09-09
Supplement: s1 [file s1]

## Supplementary file

# The phenolic compounds profile and cosmeceutical significance of two Kazakh species of onions: *Allium galanthum* and *A. turkestanicum*

Gulnara Kadyrbayeva <sup>1</sup>, Justyna Zagórska <sup>2</sup>, Agnieszka Grzegorzczuk <sup>3</sup>, Katarzyna Gawel-Beben <sup>4</sup>, Marcelina Strzępek-Gomółka <sup>4</sup>, Agnieszka Ludwiczuk <sup>5</sup>, Karolina Czech <sup>4</sup>, Manoj Kumar <sup>6</sup>, Wojciech Koch <sup>2</sup>, Anna Malm <sup>3</sup>, Kazimierz Głowniak <sup>4</sup>, Zuriyadda Sakipova <sup>1</sup> and Wirginia Kukula-Koch <sup>7,\*</sup>

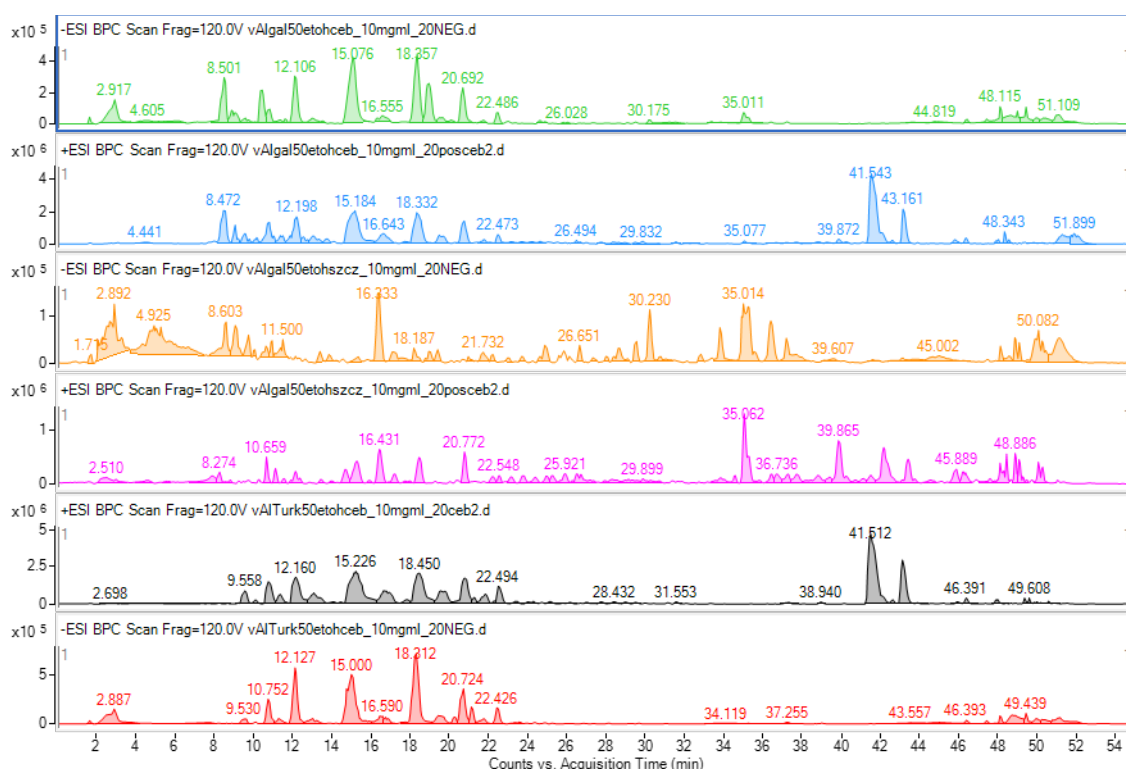

**Figure S1.** Mass chromatograms recorded for 50% ethanol extracts of Kazakhstani bulbs (top: *Allium galanthum* onion extract in negative ion mode, in positive ion mode, *Allium galanthum* chives extract in negative ion mode, in positive ion mode, *Allium turkestanicum* onion extract in positive ion mode, in negative ion mode).

**Table S1.** The MS/MS fragmentation spectra of the identified compounds.**Isoquercetin**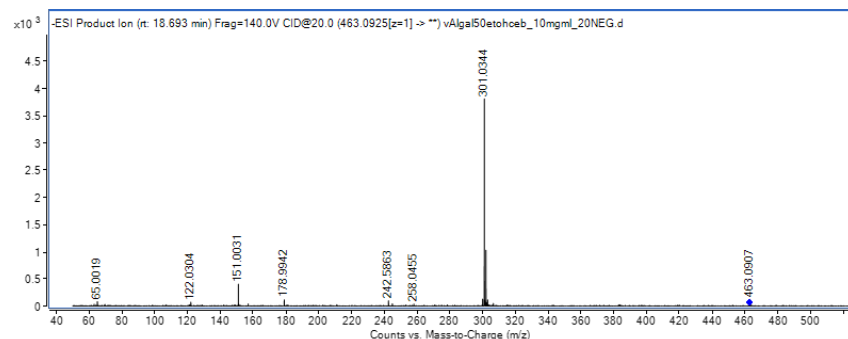**Quercetin dihexoside**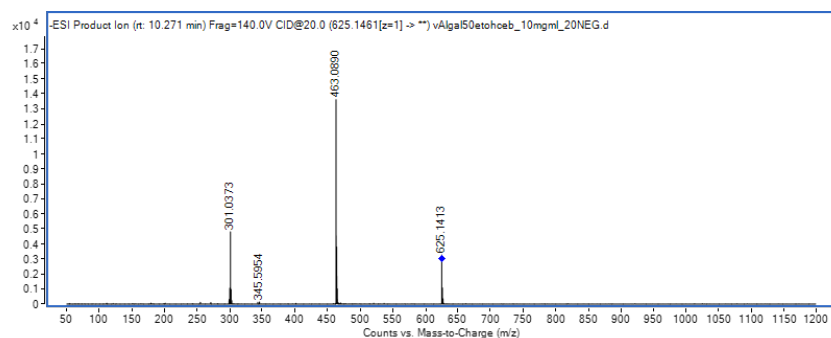**Kaempferol**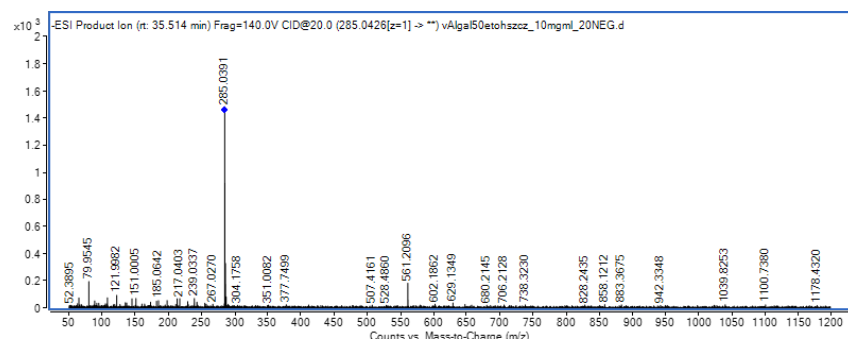**Kaempferol diglucosides**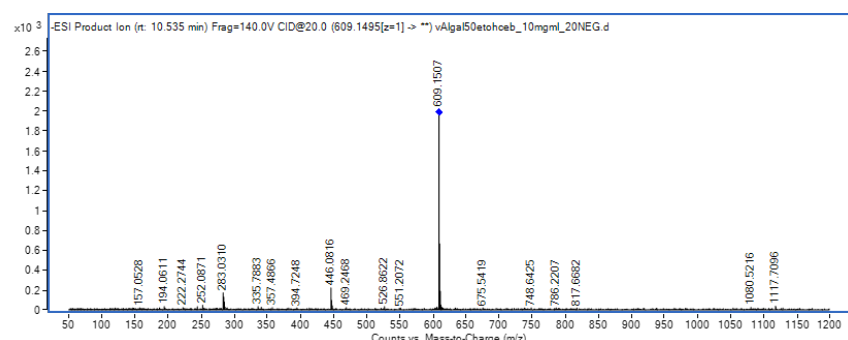

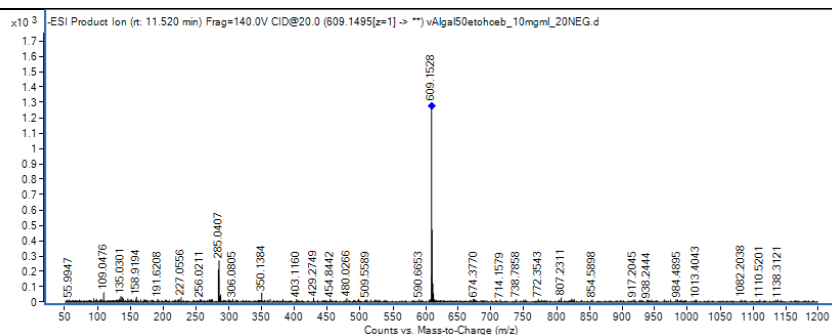

### Kaempferol glucoside

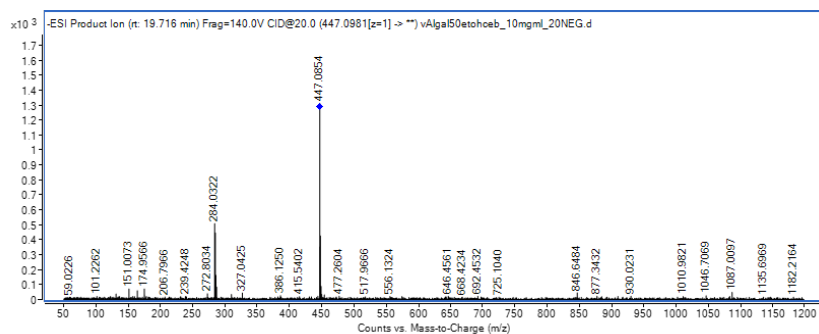

### Isorhamnetin diglucoside

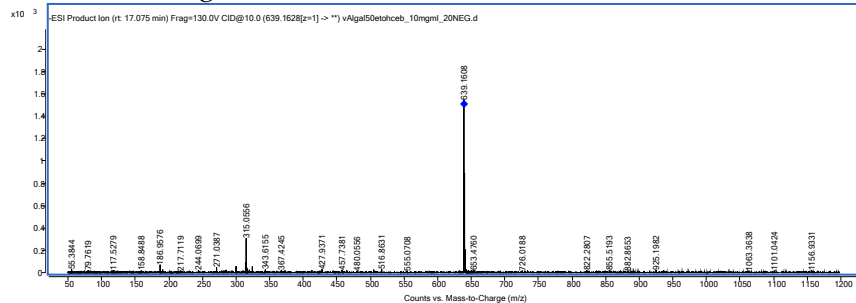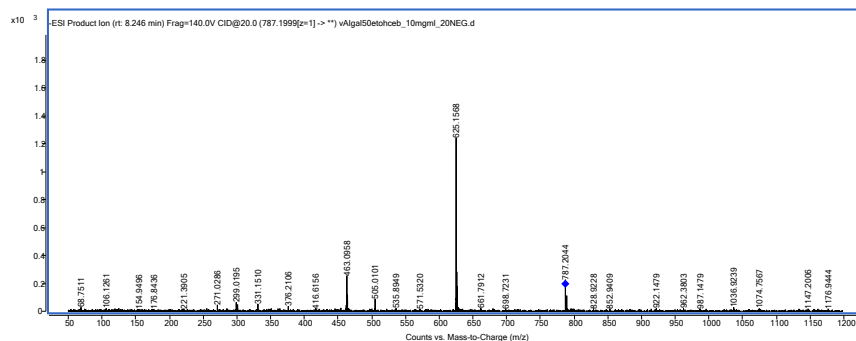

### Quercetin triglycoside

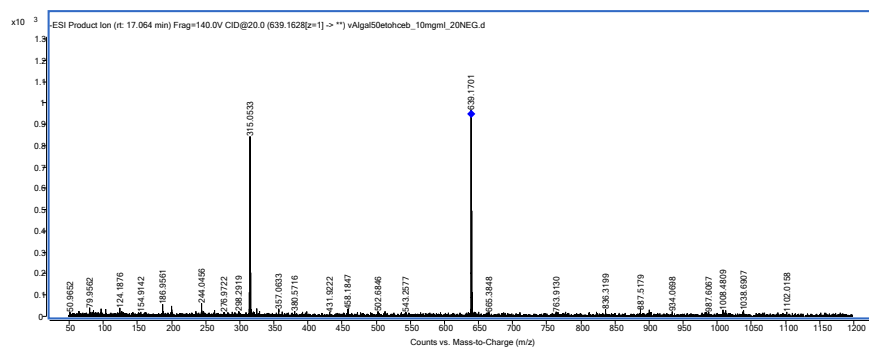

## Isorhamnetin glucoside

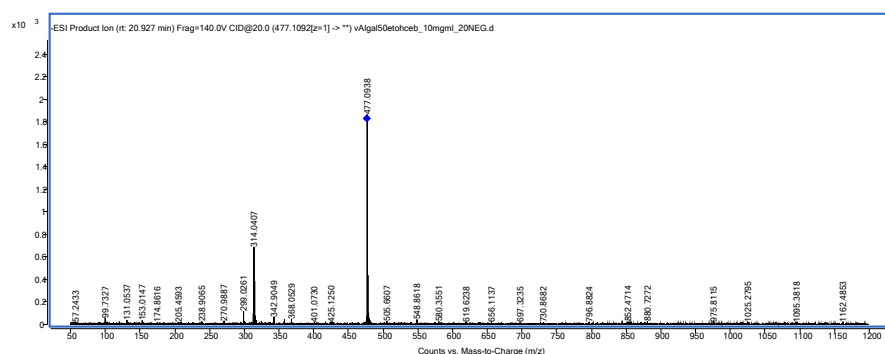

## Cyanidin glucoside

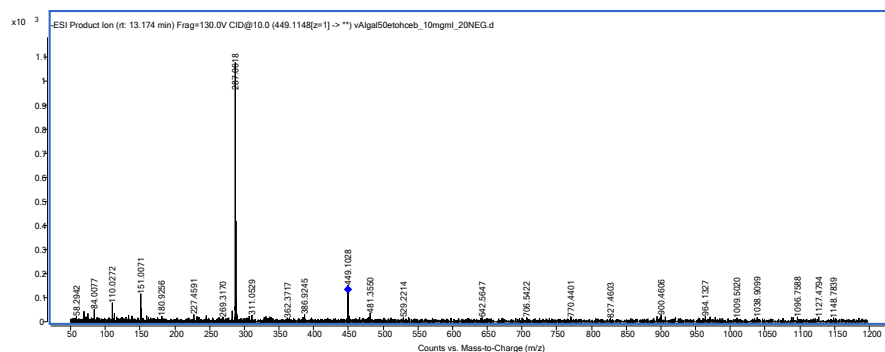

## Unknown 1

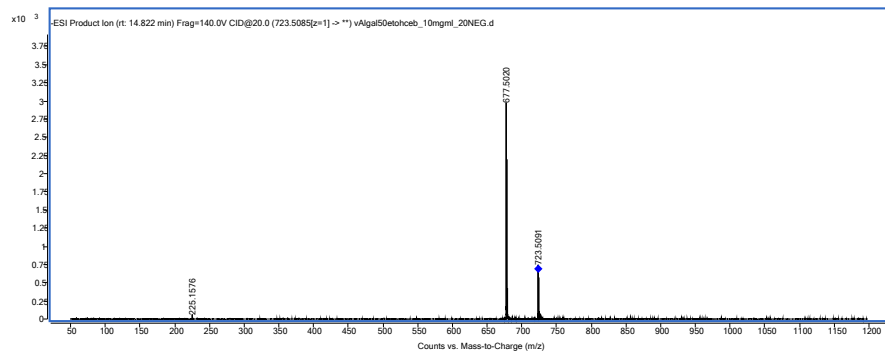

## Unknown 2

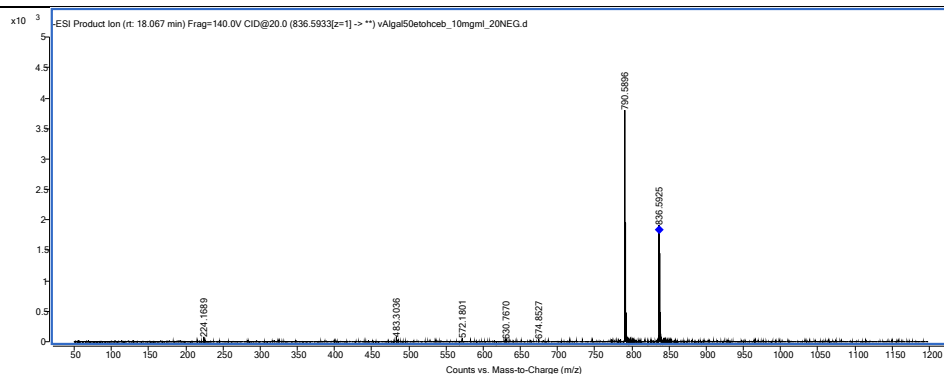

## Taxifolin glucoside

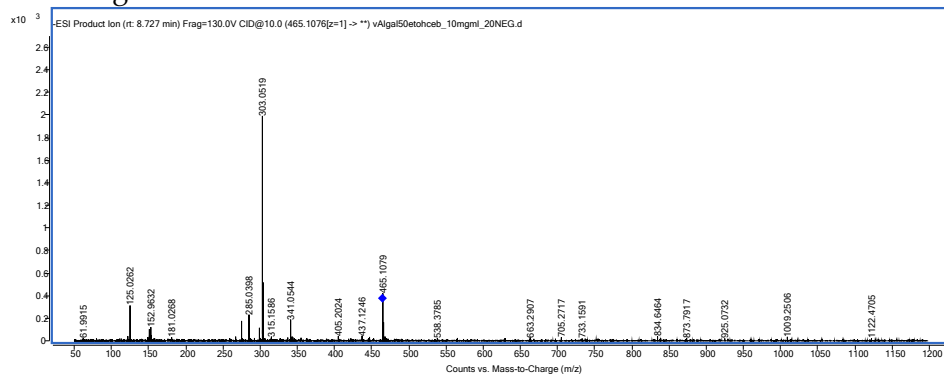

## Propylmalic acid

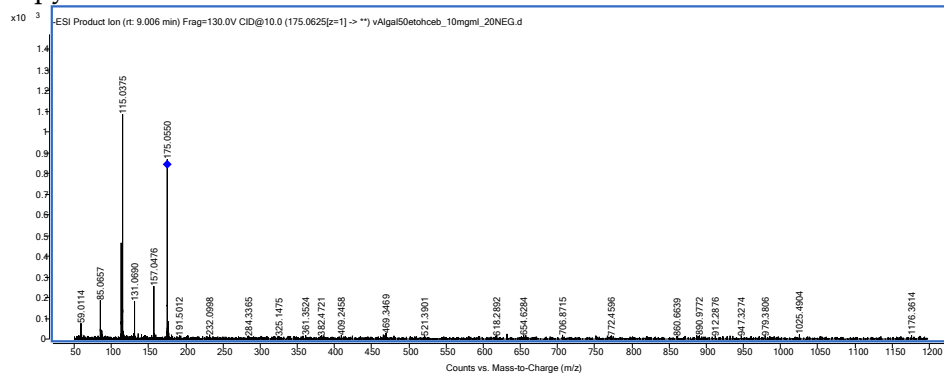

## Dihydroquercetin

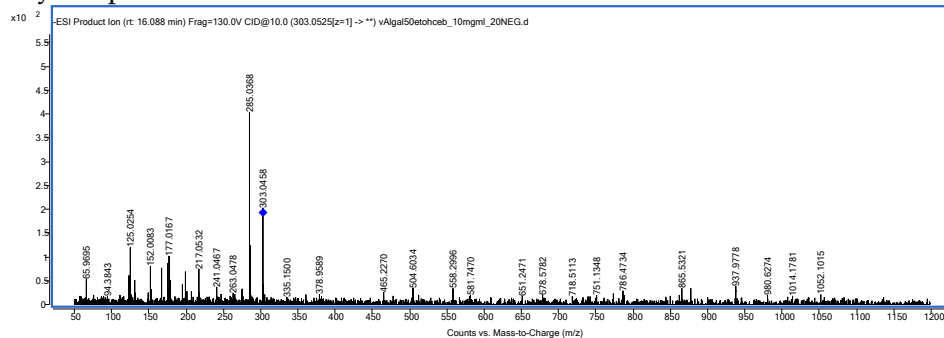

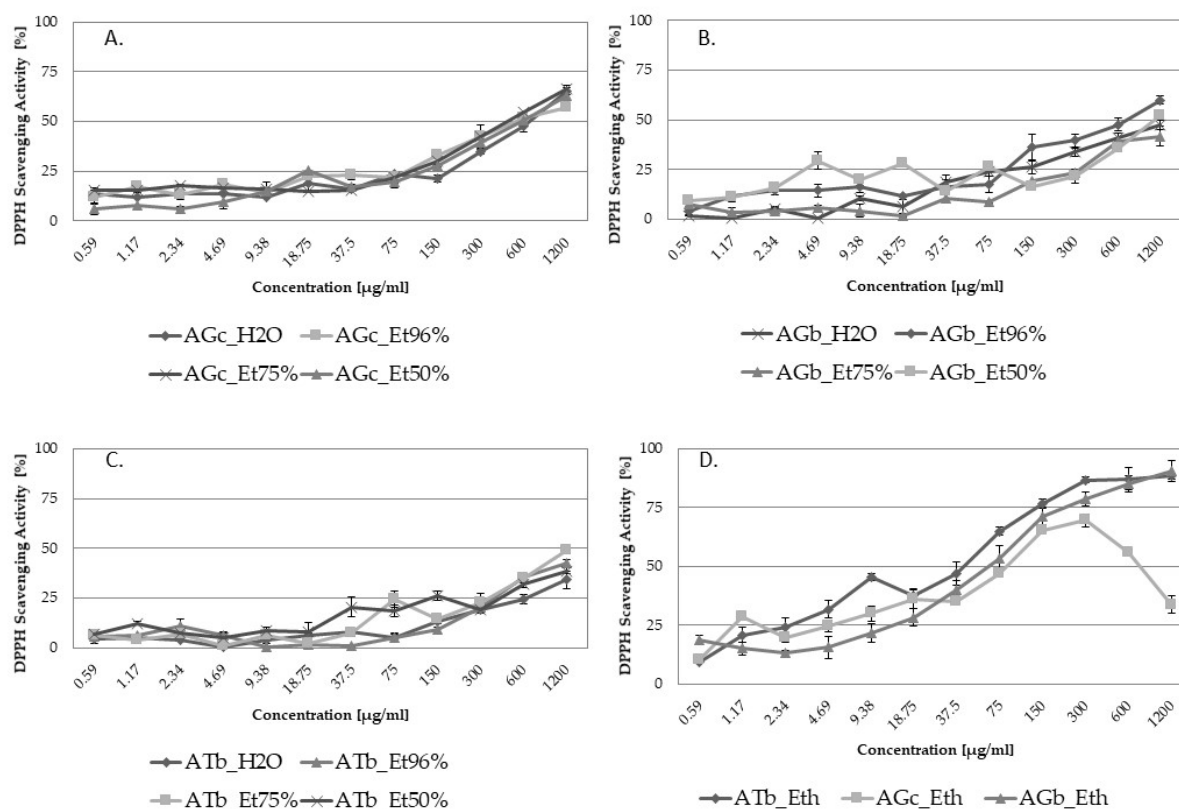

**Figure S2.** Scavenging of DPPH free radical by *A. galanthus* and *A. turkestanicum* extracts; graphs show mean  $\pm$ SD ( $n = 3$ )

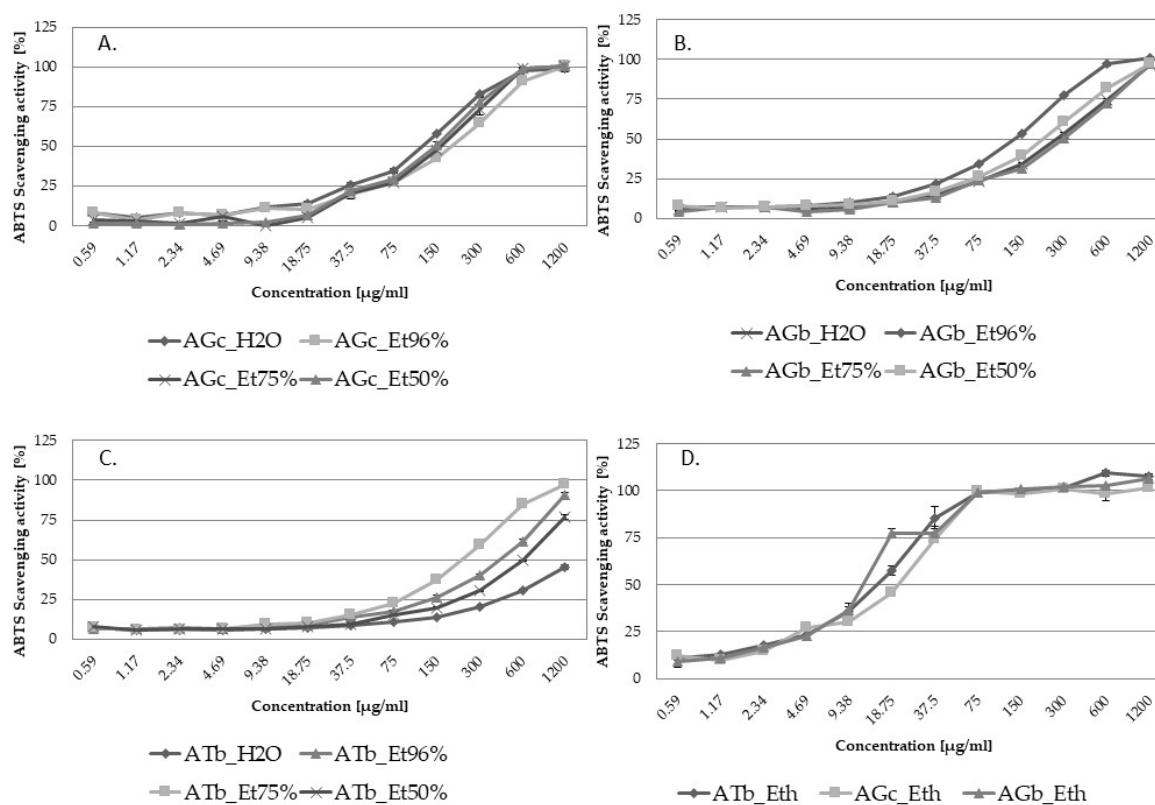

**Table S2.** The list of screened compounds during the compositional studies

|  |              |  |                                        |  |  |
|--|--------------|--|----------------------------------------|--|--|
|  |              |  | m/z<br>calculated                      |  |  |
|  | Ferulic acid |  | 194.057910<br>193.050085<br>195.065735 |  |  |

|  |  |  |                                        |  |  |
|--|--|--|----------------------------------------|--|--|
|  |  |  |                                        |  |  |
|  |  |  | 224.068475<br>223.060650<br>225.076300 |  |  |



|  |            |  |                                        |  |  |
|--|------------|--|----------------------------------------|--|--|
|  |            |  | 286.047740<br>285.039915<br>287.055565 |  |  |
|  | Kaempferol |  | 286.047740<br>285.039915<br>287.055565 |  |  |

|  |  |                                                 |                                        |  |  |
|--|--|-------------------------------------------------|----------------------------------------|--|--|
|  |  | $[M+H]^+ \text{ C}_{15}\text{H}_{11}\text{O}_6$ |                                        |  |  |
|  |  |                                                 | 270.052825<br>269.052825<br>271.060650 |  |  |

|  |  |  |                                        |  |  |
|--|--|--|----------------------------------------|--|--|
|  |  |  |                                        |  |  |
|  |  |  | 177.045966<br>176.038141<br>178.053791 |  |  |

|  |  |                                   |                                        |  |  |
|--|--|-----------------------------------|----------------------------------------|--|--|
|  |  |                                   |                                        |  |  |
|  |  |                                   | 162.017309<br>161.009484<br>163.025133 |  |  |
|  |  | C <sub>29</sub> H <sub>50</sub> O | 414.386165<br>413.378340<br>415.393990 |  |  |

380.214015  
379.206190  
381.221840

|  |  |  |                                        |  |  |
|--|--|--|----------------------------------------|--|--|
|  |  |  |                                        |  |  |
|  |  |  | 124.052430<br>123.044605<br>125.060255 |  |  |
|  |  |  | 72.021130<br>71.013305<br>73.028955    |  |  |

|  |  |  |                                        |  |  |
|--|--|--|----------------------------------------|--|--|
|  |  |  |                                        |  |  |
|  |  |  | 892.535316<br>891.527491<br>893.543141 |  |  |

|  |  |                                                                                                                  |                                        |  |  |
|--|--|------------------------------------------------------------------------------------------------------------------|----------------------------------------|--|--|
|  |  |                                                                                                                  |                                        |  |  |
|  |  |                                                                                                                  |                                        |  |  |
|  |  | $C_{55}H_{70}O_6N_4Mg$<br>[M-H] <sup>-</sup> $C_{55}H_{69}O_6N_4Mg$<br>[M+H] <sup>+</sup> $C_{55}H_{71}O_6N_4Mg$ | 906,514581<br>905.506756<br>907,522406 |  |  |
|  |  | $C_6H_8O_6$<br>[M-H] <sup>-</sup> $C_6H_7O_6$                                                                    | 176,032090<br>175.024265<br>177,039915 |  |  |
|  |  |                                                                                                                  | 177.045966<br>176.038141<br>178.053791 |  |  |



|  |  |                                                                                                                                                                                          |                                        |  |  |
|--|--|------------------------------------------------------------------------------------------------------------------------------------------------------------------------------------------|----------------------------------------|--|--|
|  |  |                                                                                                                                                                                          |                                        |  |  |
|  |  | C <sub>5</sub> H <sub>11</sub> NO <sub>2</sub> S                                                                                                                                         | 149.051051<br>148,043226<br>150,058876 |  |  |
|  |  | [M+H] <sup>+</sup> C <sub>5</sub> H <sub>12</sub> NO <sub>2</sub> S                                                                                                                      |                                        |  |  |
|  |  | C <sub>9</sub> H <sub>14</sub> OS <sub>3</sub><br>[M-H] <sup>-</sup> C <sub>9</sub> H <sub>13</sub> OS <sub>3</sub><br>[M+H] <sup>+</sup> C <sub>9</sub> H <sub>15</sub> OS <sub>3</sub> | 234.020681<br>233.012856<br>235.028506 |  |  |
|  |  | C <sub>9</sub> H <sub>14</sub> OS <sub>3</sub><br>[M-H] <sup>-</sup> C <sub>9</sub> H <sub>13</sub> OS <sub>3</sub><br>[M+H] <sup>+</sup> C <sub>9</sub> H <sub>15</sub> OS <sub>3</sub> | 234.020681<br>233.012856<br>235.028506 |  |  |

|  |  |                                                               |                                        |  |  |
|--|--|---------------------------------------------------------------|----------------------------------------|--|--|
|  |  |                                                               |                                        |  |  |
|  |  |                                                               |                                        |  |  |
|  |  | $C_6H_8S_2$<br>[M-H]- $C_6H_7S_2$<br>[M+H]+ $C_6H_9S_2$       | 144.006744<br>142.998919<br>145.014569 |  |  |
|  |  |                                                               |                                        |  |  |
|  |  | $C_6H_{10}S$<br>[M-H]- $C_6H_9S$<br>[M+H]+ $C_6H_{11}S$       | 114.050322<br>113.042497<br>115.058146 |  |  |
|  |  |                                                               |                                        |  |  |
|  |  | $C_6H_{10}S_2$<br>[M-H]- $C_6H_9S_2$<br>[M+H]+ $C_6H_{11}S_2$ | 146.022394<br>145.014569<br>147.030219 |  |  |
|  |  |                                                               |                                        |  |  |
|  |  | $C_6H_{10}S_3$<br>[M-H]- $C_6H_9S_3$                          | 177.994466<br>176.986641               |  |  |

|  |  |                                                                                                                                                                                                |                                           |  |   |
|--|--|------------------------------------------------------------------------------------------------------------------------------------------------------------------------------------------------|-------------------------------------------|--|---|
|  |  | [M+H] <sup>+</sup> C <sub>6</sub> H <sub>11</sub> S <sub>3</sub>                                                                                                                               | 179.002291                                |  |   |
|  |  | C <sub>4</sub> H <sub>8</sub> S<br>[M-H] <sup>-</sup> C <sub>4</sub> H <sub>7</sub> S<br>[M+H] <sup>+</sup> C <sub>4</sub> H <sub>9</sub> S                                                    | 88.034672<br>87.026847<br>89.042497       |  |   |
|  |  | C <sub>69</sub> H <sub>114</sub> O <sub>39</sub><br>[M-H] <sup>-</sup> C <sub>69</sub> H <sub>113</sub> O <sub>39</sub><br>[M+H] <sup>+</sup> C <sub>69</sub> H <sub>115</sub> O <sub>39</sub> | 1566.693735<br>1565.685910<br>1567.701560 |  | 5 |
|  |  | C <sub>62</sub> H <sub>100</sub> O <sub>34</sub><br>[M-H] <sup>-</sup> C <sub>62</sub> H <sub>99</sub> O <sub>34</sub><br>[M+H] <sup>+</sup> C <sub>62</sub> H <sub>101</sub> O <sub>34</sub>  | 1388.609610<br>1387.601785<br>1389.617435 |  |   |

|  |  |                                                                                                               |                                           |  |  |
|--|--|---------------------------------------------------------------------------------------------------------------|-------------------------------------------|--|--|
|  |  |                                                                                                               |                                           |  |  |
|  |  | $C_{62}H_{102}O_{36}$<br>[M-H] <sup>-</sup> $C_{62}H_{101}O_{36}$<br>[M+H] <sup>+</sup> $C_{62}H_{103}O_{36}$ | 1422.615090<br>1421.607265<br>1423.622915 |  |  |
|  |  | $C_{56}H_{94}O_{27}$<br>[M-H] <sup>-</sup> $C_{56}H_{93}O_{27}$<br>[M+H] <sup>+</sup> $C_{56}H_{95}O_{27}$    | 1198.598254<br>1197.590430<br>1199.606080 |  |  |

|  |  |                                                                                                               |                                           |  |  |
|--|--|---------------------------------------------------------------------------------------------------------------|-------------------------------------------|--|--|
|  |  | $C_{62}H_{104}O_{32}$<br>[M-H] <sup>-</sup> $C_{62}H_{103}O_{32}$<br>[M+H] <sup>+</sup> $C_{62}H_{105}O_{32}$ | 1360.651080<br>1359.643255<br>1361.658905 |  |  |
|  |  | -                                                                                                             | -                                         |  |  |
|  |  | $C_5H_{11}NO_3S_2$<br>[M-H] <sup>-</sup> $C_5H_{10}NO_3S_2$<br>[M+H] <sup>+</sup> $C_5H_{12}NO_3S_2$          | 197.018038<br>196.010213<br>198.025863    |  |  |

|  |  |                                                                                                                     |                                        |  |  |
|--|--|---------------------------------------------------------------------------------------------------------------------|----------------------------------------|--|--|
|  |  | $C_{10}H_{18}N_2O_6S_2$<br>[M-H] <sup>-</sup> $C_{10}H_{17}N_2O_6S_2$<br>[M+H] <sup>+</sup> $C_{10}H_{19}N_2O_6S_2$ | 326.060632<br>325.052807<br>327.068456 |  |  |
|  |  | $C_4H_9NO_3S$<br>[M-H] <sup>-</sup> $C_4H_8NO_3S$<br>[M+H] <sup>+</sup> $C_4H_{10}NO_3S$                            | 151.030316<br>150.022491<br>152.038141 |  |  |

|  |  |                                                                                                   |                                        |  |  |
|--|--|---------------------------------------------------------------------------------------------------|----------------------------------------|--|--|
|  |  |                                                                                                   |                                        |  |  |
|  |  | $C_6H_{13}NO_3S$<br>[M-H] <sup>-</sup> $C_6H_{12}NO_3S$<br>[M+H] <sup>+</sup> $C_6H_{14}NO_3S$    | 179.061616<br>178.053791<br>180.069440 |  |  |
|  |  | $C_7H_{10}N_2O_3S$<br>[M-H] <sup>-</sup> $C_7H_9N_2O_3S$<br>[M+H] <sup>+</sup> $C_7H_{11}N_2O_3S$ | 202.041215<br>201.033390<br>203.049040 |  |  |

|  |  |                                                                                                   |                                        |  |  |
|--|--|---------------------------------------------------------------------------------------------------|----------------------------------------|--|--|
|  |  | $C_8H_{10}N_2O_3S$<br>[M-H] <sup>-</sup> $C_8H_9N_2O_3S$<br>[M+H] <sup>+</sup> $C_8H_{11}N_2O_3S$ | 214.041215<br>213.033390<br>215.049040 |  |  |
|  |  | $C_8H_{10}N_2O_3S$<br>[M-H] <sup>-</sup> $C_8H_9N_2O_3S$<br>[M+H] <sup>+</sup> $C_8H_{11}N_2O_3S$ | 214.041215<br>213.033390<br>215.049040 |  |  |



|  |  |                                                                                             |                                        |  |  |
|--|--|---------------------------------------------------------------------------------------------|----------------------------------------|--|--|
|  |  |                                                                                             |                                        |  |  |
|  |  | $C_{18}H_{36}O$<br>[M-H] <sup>-</sup> $C_{18}H_{35}O$<br>[M+H] <sup>+</sup> $C_{18}H_{37}O$ | 268.276615<br>267.268789<br>269.284440 |  |  |
|  |  | $C_2H_6O$<br>[M-H] <sup>-</sup> $C_2H_5O$<br>[M+H] <sup>+</sup> $C_2H_7O$                   | 46.041865<br>45.034040<br>47.049690    |  |  |
|  |  | $C_{29}H_{50}O$<br>[M-H] <sup>-</sup> $C_{29}H_{49}O$<br>[M+H] <sup>+</sup> $C_{29}H_{51}O$ | 414.386165<br>413.378340<br>415.393990 |  |  |

|  |  |                                                                                             |                                        |  |  |
|--|--|---------------------------------------------------------------------------------------------|----------------------------------------|--|--|
|  |  |                                                                                             |                                        |  |  |
|  |  | $C_{29}H_{46}$<br>[M-H] <sup>-</sup> $C_{29}H_{45}$<br>[M+H] <sup>+</sup> $C_{29}H_{47}$    | 394.359950<br>393.352125<br>395.367775 |  |  |
|  |  | $C_{19}H_{40}O$<br>[M-H] <sup>-</sup> $C_{19}H_{39}O$<br>[M+H] <sup>+</sup> $C_{19}H_{41}O$ | 284.307915<br>283.300090<br>285.315740 |  |  |
|  |  | $C_{15}H_{32}O$<br>[M-H] <sup>-</sup> $C_{15}H_{31}O$<br>[M+H] <sup>+</sup> $C_{15}H_{33}O$ | 228.245315<br>227.237490<br>229.253140 |  |  |

|  |  |                                                                                                            |                                        |  |  |
|--|--|------------------------------------------------------------------------------------------------------------|----------------------------------------|--|--|
|  |  |                                                                                                            |                                        |  |  |
|  |  | $C_6H_8S_2$<br>[M-H] <sup>-</sup> $C_6H_7S_2$<br>[M+H] <sup>+</sup> $C_6H_9S_2$                            | 144.006744<br>142.998919<br>145.014569 |  |  |
|  |  | $C_{21}H_{20}O_{11}$<br>[M-H] <sup>-</sup> $C_{21}H_{19}O_{11}$<br>[M+H] <sup>+</sup> $C_{21}H_{21}O_{11}$ | 448.100564<br>447.092740<br>449.108390 |  |  |

|  |  |                                                                                                                                                                                         |                                                     |  |  |
|--|--|-----------------------------------------------------------------------------------------------------------------------------------------------------------------------------------------|-----------------------------------------------------|--|--|
|  |  |                                                                                                                                                                                         |                                                     |  |  |
|  |  | <div>C<sub>21</sub>H<sub>20</sub>O<sub>12</sub><br/>[M-H]<sup>-</sup> C<sub>21</sub>H<sub>19</sub>O<sub>12</sub><br/>[M+H]<sup>+</sup> C<sub>21</sub>H<sub>21</sub>O<sub>12</sub></div> | <div>464.095480<br/>463.087655<br/>465.103305</div> |  |  |

|  |  |                                                                                                                                                                                                            |                                                 |  |  |
|--|--|------------------------------------------------------------------------------------------------------------------------------------------------------------------------------------------------------------|-------------------------------------------------|--|--|
|  |  |                                                                                                                                                                                                            |                                                 |  |  |
|  |  | <p>Kaempferol 3-O-glucoside-<br/>7-O-glucuronide<br/><math>C_{27}H_{28}O_{17}</math><br/>[M-H]<math>^-</math> <math>C_{27}H_{27}O_{17}</math><br/>[M+H]<math>^+</math> <math>C_{27}H_{29}O_{17}</math></p> | <p>624.132655<br/>623.124830<br/>625.140480</p> |  |  |

|  |  |                                                                                                                                                                                           |                                                 |  |  |
|--|--|-------------------------------------------------------------------------------------------------------------------------------------------------------------------------------------------|-------------------------------------------------|--|--|
|  |  | <p>Kaempferol 3-<br/>neohesperidoside<br/><math>C_{27}H_{30}O_{15}</math><br/>[M-H]<sup>-</sup> <math>C_{27}H_{29}O_{15}</math><br/>[M+H]<sup>+</sup> <math>C_{27}H_{31}O_{15}</math></p> | <p>594.158475<br/>593.150650<br/>595.166300</p> |  |  |
|  |  | <p><math>C_{27}H_{30}O_{16}</math><br/>[M-H]<sup>-</sup> <math>C_{27}H_{29}O_{16}</math><br/>[M+H]<sup>+</sup> <math>C_{27}H_{31}O_{16}</math></p>                                        | <p>610.153390<br/>609.145565<br/>611.161215</p> |  |  |

|  |  |                                                                                                                                                                                                                       |                                                 |  |  |
|--|--|-----------------------------------------------------------------------------------------------------------------------------------------------------------------------------------------------------------------------|-------------------------------------------------|--|--|
|  |  |                                                                                                                                                                                                                       |                                                 |  |  |
|  |  | <p>Quercetin 3-glucoside-7-glucuronide<br/><math>C_{27}H_{28}O_{18}</math><br/>[M-H]<sup>-</sup> <math>C_{27}H_{27}O_{18}</math><br/>[M+H]<sup>+</sup> <math>C_{27}H_{29}O_{18}</math></p>                            | <p>640.127570<br/>639.119745<br/>641.135395</p> |  |  |
|  |  | <p>quercetin 3,7-di-O-β-D-glucoside<br/>Quercetin 3,7-diglucoside<br/><math>C_{27}H_{30}O_{17}</math><br/>[M-H]<sup>-</sup> <math>C_{27}H_{29}O_{17}</math><br/>[M+H]<sup>+</sup> <math>C_{27}H_{31}O_{17}</math></p> | <p>626.148305<br/>625.140480<br/>627.156130</p> |  |  |

|  |  |                                                                                      |                                        |  |  |
|--|--|--------------------------------------------------------------------------------------|----------------------------------------|--|--|
|  |  |                                                                                      |                                        |  |  |
|  |  | $C_9H_8O_3$<br>$[M-H]^- C_9H_7O_3$<br>$[M+H]^+ C_9H_9O_3$                            | 164.047345<br>163.039520<br>165.055170 |  |  |
|  |  | $C_{27}H_{30}O_{16}$<br>$[M-H]^- C_{27}H_{29}O_{16}$<br>$[M+H]^+ C_{27}H_{31}O_{16}$ | 610.153390<br>609.145565<br>611.161215 |  |  |

([1] Laurian Vlase, Marcel Parvu, Elena Alina Parvu, and Anca Toiu. Chemical Constituents of Three Allium Species from Romania, 2012; [2] D.I.Stajner, A.Kapor, Exploring Allium species as a Source of Potential Medicinal Agents, 2006; [3] Kusterer, J., Fritsch, R. M., & Keusgen, M. (2011). Allium Species from Central and Southwest Asia Are Rich Sources of Marasmin. Journal of Agricultural and Food Chemistry, 59(15), 8289–8297.; [4] Modern state of the study of some plants of the genus Allium L.: a review article [5] Kuroda, M., Ori, K., Takayama, H., Sakagami, H., & Mimaki, Y. (2015). Karataviosides G–K, five new bisdesmosidic steroidal glycosides from the bulbs of Allium karataviense. Steroids, 93, 96–104. doi:10.1016/j.steroids.2014.09.010; [6] de Guzman Alvindia, D., Mangoba, M.A.A. Bioactivities of *Allium longicuspis* Regel against anthracnose of mango caused by *Colletotrichum gloeosporioides* (Penz.). Scientific Reports volume 10, Article number: 11367 (2020), [7] D. N. Olennikov. Flavonol glycosides from leaves of Allium microdictyon. Chemistry of Natural Compounds, Vol. 56, No. 6, November, 2020. 56(6):1035-1039)
